# Supplementary material for: Comparative Analysis of Chloroplast Genomes of Four Medicinal Capparaceae Species: Genome Structures, Phylogenetic Relationships and Adaptive Evolution
Source: MDPI journal article supplement (doi:10.3390/plants10061229), 2021-06-17
Supplement: s1 [file s1]

## Supplementary

Title: **Comparative Analysis of Chloroplast Genomes for four Medicinal Capparaceae Species: Molecular Structure, Phylogenetic Relationships and Adaptive Evolution**

Dhafer A. Alzahrani <sup>1,\*</sup>, Enas J. Albokhari <sup>1,2</sup>, Samaila S. Yaradua <sup>1</sup> and Abidina Abba <sup>1</sup>

<sup>1</sup> Department of Biological Sciences, Faculty of Science, King Abdulaziz University, P.O. Box 80203, Jeddah 21589, Saudi Arabia

<sup>2</sup> Department of Biological Sciences, Faculty of Applied Sciences, Umm Al-Qura University, Makkah, Saudi Arabia

\* Correspondence: **Dhafer A. Alzahrani** dalzahrani@kau.edu.sa, Tel: 00966555546409; **Enas J. Albokhari** enasbokhary@hotmail.com

**Table S1.** Codon – anticodon recognition patterns and codon usage of the *Cadaba farinosa* chloroplast genome

| Codon | Amino Acid | RSCU | tRNA            | Codon | Amino Acid | RSCU | tRNA            |
|-------|------------|------|-----------------|-------|------------|------|-----------------|
| UUU   | Phe        | 1.24 | <i>trnF-GAA</i> | UAU   | Tyr        | 1.31 | <i>trnY-GUA</i> |
| UUC   | Phe        | 0.76 |                 | UAC   | Tyr        | 0.69 |                 |
| UUA   | Leu        | 1.43 | <i>trnL-UAA</i> | UAA   | Stop       | 1.1  |                 |
| UUG   | Leu        | 1.36 | <i>trnL-CAA</i> | UAG   | Stop       | 0.84 |                 |
| CUU   | Leu        | 1.22 | <i>trnL-UAG</i> | CAU   | His        | 1.38 | <i>trnH-GUG</i> |
| CUC   | Leu        | 0.67 |                 | CAC   | His        | 0.62 |                 |
| CUA   | Leu        | 0.79 |                 | CAA   | Gln        | 1.36 | <i>trnQ-UUG</i> |
| CUG   | Leu        | 0.53 |                 | CAG   | Gln        | 0.64 |                 |
| AUU   | Ile        | 1.34 | <i>trnI-GAU</i> | AAU   | Asn        | 1.33 | <i>trnN-GUU</i> |
| AUC   | Ile        | 0.82 |                 | AAC   | Asn        | 0.67 |                 |
| AUA   | Ile        | 0.85 | <i>trnI-CAU</i> | AAA   | Lys        | 1.35 | <i>trnK-UUU</i> |
| AUG   | Met        | 1    | <i>trnM-CAU</i> | AAG   | Lys        | 0.65 |                 |
| GUU   | Val        | 1.38 | <i>trnV-GAC</i> | GAU   | Asp        | 1.41 | <i>trnD-GUC</i> |
| GUC   | Val        | 0.76 |                 | GAC   | Asp        | 0.59 |                 |
| GUA   | Val        | 1.22 |                 | GAA   | Glu        | 1.35 | <i>trnE-UUC</i> |
| GUG   | Val        | 0.64 | <i>trnV-UAC</i> | GAG   | Glu        | 0.65 |                 |
| UCU   | Ser        | 1.42 | <i>trnS-GGA</i> | UGU   | Cys        | 1.03 | <i>trnC-GCA</i> |
| UCC   | Ser        | 0.93 |                 | UGC   | Cys        | 0.97 |                 |
| UCA   | Ser        | 1.38 |                 | UGA   | Stop       | 1.06 |                 |
| UCG   | Ser        | 0.73 | <i>trnS-UGA</i> | UGG   | Trp        | 1    | <i>trnW-CCA</i> |
| CCU   | Pro        | 1.24 | <i>trnP-UGG</i> | CGU   | Arg        | 0.65 | <i>trnR-ACG</i> |
| CCC   | Pro        | 0.8  |                 | CGC   | Arg        | 0.32 | <i>trnR-UCU</i> |
| CCA   | Pro        | 1.23 |                 | CGA   | Arg        | 1.01 |                 |
| CCG   | Pro        | 0.73 |                 | CGG   | Arg        | 0.64 |                 |
| ACU   | Thr        | 1.04 |                 | AGA   | Arg        | 2.05 |                 |
| ACC   | Thr        | 0.95 |                 | AGG   | Arg        | 1.33 |                 |
| ACA   | Thr        | 1.25 | <i>trnT-GGU</i> | AGU   | Ser        | 0.84 | <i>trnS-GCU</i> |
| ACG   | Thr        | 0.75 | <i>trnT-UGU</i> | AGC   | Ser        | 0.7  |                 |
| GCU   | Ala        | 1.34 | <i>trnA-UGC</i> | GGU   | Gly        | 1    |                 |
| GCC   | Ala        | 0.81 |                 | GGC   | Gly        | 0.57 |                 |
| GCA   | Ala        | 1.14 |                 | GGA   | Gly        | 1.44 |                 |
| GCG   | Ala        | 0.72 |                 | GGG   | Gly        | 0.99 | <i>trnG-UCC</i> |

**Table S2.** Codon – anticodon recognition patterns and codon usage of the *Cadaba glandulosa* chloroplast genome

| Codon | Amino Acid | RSCU | tRNA            | Codon | Amino Acid | RSCU | tRNA            |
|-------|------------|------|-----------------|-------|------------|------|-----------------|
| UUU   | Phe        | 1.23 | <i>trnF-GAA</i> | UAU   | Tyr        | 1.36 | <i>trnY-GUA</i> |
| UUC   | Phe        | 0.77 |                 | UAC   | Tyr        | 0.64 |                 |
| UUA   | Leu        | 1.27 | <i>trnL-UAA</i> | UAA   | Stop       | 1.07 |                 |
| UUG   | Leu        | 1.28 | <i>trnL-CAA</i> | UAG   | Stop       | 0.96 |                 |
| CUU   | Leu        | 1.19 | <i>trnL-UAG</i> | CAU   | His        | 1.27 | <i>trnH-GUG</i> |
| CUC   | Leu        | 0.66 |                 | CAC   | His        | 0.73 |                 |
| CUA   | Leu        | 0.98 |                 | CAA   | Gln        | 1.3  | <i>trnQ-UUG</i> |
| CUG   | Leu        | 0.63 |                 | CAG   | Gln        | 0.7  |                 |
| AUU   | Ile        | 1.27 | <i>trnI-GAU</i> | AAU   | Asn        | 1.35 | <i>trnN-GUU</i> |
| AUC   | Ile        | 0.77 |                 | AAC   | Asn        | 0.65 |                 |
| AUA   | Ile        | 0.97 | <i>trnI-CAU</i> | AAA   | Lys        | 1.34 | <i>trnK-UUU</i> |
| AUG   | Met        | 1    | <i>trnM-CAU</i> | AAG   | Lys        | 0.66 |                 |
| GUU   | Val        | 1.37 | <i>trnV-GAC</i> | GAU   | Asp        | 1.44 | <i>trnD-GUC</i> |
| GUC   | Val        | 0.71 |                 | GAC   | Asp        | 0.56 |                 |
| GUA   | Val        | 1.17 |                 | GAA   | Glu        | 1.36 | <i>trnE-UUC</i> |
| GUG   | Val        | 0.75 | <i>trnV-UAC</i> | GAG   | Glu        | 0.64 |                 |
| UCU   | Ser        | 1.35 | <i>trnS-GGA</i> | UGU   | Cys        | 1.19 | <i>trnC-GCA</i> |
| UCC   | Ser        | 0.93 |                 | UGC   | Cys        | 0.81 |                 |
| UCA   | Ser        | 1.44 |                 | UGA   | Stop       | 0.97 |                 |
| UCG   | Ser        | 0.79 | <i>trnS-UGA</i> | UGG   | Trp        | 1    | <i>trnW-CCA</i> |
| CCU   | Pro        | 1.22 | <i>trnP-UGG</i> | CGU   | Arg        | 0.65 | <i>trnR-ACG</i> |
| CCC   | Pro        | 0.77 |                 | CGC   | Arg        | 0.39 | <i>trnR-UCU</i> |
| CCA   | Pro        | 1.18 |                 | CGA   | Arg        | 0.97 |                 |
| CCG   | Pro        | 0.83 |                 | CGG   | Arg        | 0.71 |                 |
| ACU   | Thr        | 1.2  |                 | AGA   | Arg        | 2.06 |                 |
| ACC   | Thr        | 0.75 |                 | AGG   | Arg        | 1.22 |                 |
| ACA   | Thr        | 1.35 | <i>trnT-GGU</i> | AGU   | Ser        | 0.87 | <i>trnS-GCU</i> |
| ACG   | Thr        | 0.71 | <i>trnT-UGU</i> | AGC   | Ser        | 0.63 |                 |
| GCU   | Ala        | 1.34 | <i>trnA-UGC</i> | GGU   | Gly        | 1.04 |                 |
| GCC   | Ala        | 0.73 |                 | GGC   | Gly        | 0.51 |                 |
| GCA   | Ala        | 1.23 |                 | GGA   | Gly        | 1.42 |                 |
| GCG   | Ala        | 0.7  |                 | GGG   | Gly        | 1.02 | <i>trnG-UCC</i> |

**Table S3.** Codon – anticodon recognition patterns and codon usage of the *Maerua crassifolia* chloroplast genome

| Codon | Amino Acid | RSCU | tRNA            | Codon | Amino Acid | RSCU | tRNA            |
|-------|------------|------|-----------------|-------|------------|------|-----------------|
| UUU   | Phe        | 1.22 | <i>trnF-GAA</i> | UAU   | Tyr        | 1.38 | <i>trnY-GUA</i> |
| UUC   | Phe        | 0.78 |                 | UAC   | Tyr        | 0.62 |                 |
| UUA   | Leu        | 1.41 | <i>trnL-UAA</i> | UAA   | Stop       | 1.07 |                 |
| UUG   | Leu        | 1.26 | <i>trnL-CAA</i> | UAG   | Stop       | 0.87 |                 |
| CUU   | Leu        | 1.15 | <i>trnL-UAG</i> | CAU   | His        | 1.38 | <i>trnH-GUG</i> |
| CUC   | Leu        | 0.68 |                 | CAC   | His        | 0.62 |                 |
| CUA   | Leu        | 0.92 |                 | CAA   | Gln        | 1.39 | <i>trnQ-UUG</i> |
| CUG   | Leu        | 0.57 |                 | CAG   | Gln        | 0.61 |                 |
| AUU   | Ile        | 1.32 | <i>trnI-GAU</i> | AAU   | Asn        | 1.4  | <i>trnN-GUU</i> |
| AUC   | Ile        | 0.78 |                 | AAC   | Asn        | 0.6  |                 |
| AUA   | Ile        | 0.9  | <i>trnI-CAU</i> | AAA   | Lys        | 1.35 | <i>trnK-UUU</i> |
| AUG   | Met        | 1    | <i>trnM-CAU</i> | AAG   | Lys        | 0.65 |                 |
| GUU   | Val        | 1.39 | <i>trnV-GAC</i> | GAU   | Asp        | 1.46 | <i>trnD-GUC</i> |
| GUC   | Val        | 0.71 |                 | GAC   | Asp        | 0.54 |                 |
| GUA   | Val        | 1.24 |                 | GAA   | Glu        | 1.37 | <i>trnE-UUC</i> |
| GUG   | Val        | 0.66 | <i>trnV-UAC</i> | GAG   | Glu        | 0.63 |                 |
| UCU   | Ser        | 1.4  | <i>trnS-GGA</i> | UGU   | Cys        | 1.17 | <i>trnC-GCA</i> |
| UCC   | Ser        | 0.91 |                 | UGC   | Cys        | 0.83 |                 |
| UCA   | Ser        | 1.39 |                 | UGA   | Stop       | 1.06 |                 |
| UCG   | Ser        | 0.78 | <i>trnS-UGA</i> | UGG   | Trp        | 1    | <i>trnW-CCA</i> |
| CCU   | Pro        | 1.3  | <i>trnP-UGG</i> | CGU   | Arg        | 0.74 | <i>trnR-ACG</i> |
| CCC   | Pro        | 0.73 |                 | CGC   | Arg        | 0.32 | <i>trnR-UCU</i> |
| CCA   | Pro        | 1.17 |                 | CGA   | Arg        | 1    |                 |
| CCG   | Pro        | 0.8  |                 | CGG   | Arg        | 0.6  |                 |
| ACU   | Thr        | 1.19 |                 | AGA   | Arg        | 2.16 |                 |
| ACC   | Thr        | 0.88 |                 | AGG   | Arg        | 1.18 |                 |
| ACA   | Thr        | 1.28 | <i>trnT-GGU</i> | AGU   | Ser        | 0.93 | <i>trnS-GCU</i> |
| ACG   | Thr        | 0.65 | <i>trnT-UGU</i> | AGC   | Ser        | 0.59 |                 |
| GCU   | Ala        | 1.48 | <i>trnA-UGC</i> | GGU   | Gly        | 1.14 |                 |
| GCC   | Ala        | 0.66 |                 | GGC   | Gly        | 0.49 |                 |
| GCA   | Ala        | 1.25 |                 | GGA   | Gly        | 1.39 |                 |
| GCG   | Ala        | 0.61 |                 | GGG   | Gly        | 0.98 | <i>trnG-UCC</i> |

**Table S4.** Codon – anticodon recognition patterns and codon usage of the *Maerua oblongifolia* chloroplast genome

| Codon | Amino Acid | RSCU | tRNA            | Codon | Amino Acid | RSCU | tRNA            |
|-------|------------|------|-----------------|-------|------------|------|-----------------|
| UUU   | Phe        | 1.25 | <i>trnF-GAA</i> | UAU   | Tyr        | 1.33 | <i>trnY-GUA</i> |
| UUC   | Phe        | 0.75 |                 | UAC   | Tyr        | 0.67 |                 |
| UUA   | Leu        | 1.32 | <i>trnL-UAA</i> | UAA   | Stop       | 1.04 |                 |
| UUG   | Leu        | 1.26 | <i>trnL-CAA</i> | UAG   | Stop       | 0.89 |                 |
| CUU   | Leu        | 1.24 | <i>trnL-UAG</i> | CAU   | His        | 1.36 | <i>trnH-GUG</i> |
| CUC   | Leu        | 0.75 |                 | CAC   | His        | 0.64 |                 |
| CUA   | Leu        | 0.84 |                 | CAA   | Gln        | 1.38 | <i>trnQ-UUG</i> |
| CUG   | Leu        | 0.6  |                 | CAG   | Gln        | 0.62 |                 |
| AUU   | Ile        | 1.38 | <i>trnI-GAU</i> | AAU   | Asn        | 1.37 | <i>trnN-GUU</i> |
| AUC   | Ile        | 0.84 |                 | AAC   | Asn        | 0.63 |                 |
| AUA   | Ile        | 0.78 | <i>trnI-CAU</i> | AAA   | Lys        | 1.35 | <i>trnK-UUU</i> |
| AUG   | Met        | 1    | <i>trnM-CAU</i> | AAG   | Lys        | 0.65 |                 |
| GUU   | Val        | 1.41 | <i>trnV-GAC</i> | GAU   | Asp        | 1.44 | <i>trnD-GUC</i> |
| GUC   | Val        | 0.73 |                 | GAC   | Asp        | 0.56 |                 |
| GUA   | Val        | 1.13 |                 | GAA   | Glu        | 1.35 | <i>trnE-UUC</i> |
| GUG   | Val        | 0.73 | <i>trnV-UAC</i> | GAG   | Glu        | 0.65 |                 |
| UCU   | Ser        | 1.48 | <i>trnS-GGA</i> | UGU   | Cys        | 1.14 | <i>trnC-GCA</i> |
| UCC   | Ser        | 0.94 |                 | UGC   | Cys        | 0.86 |                 |
| UCA   | Ser        | 1.36 |                 | UGA   | Stop       | 1.06 |                 |
| UCG   | Ser        | 0.75 | <i>trnS-UGA</i> | UGG   | Trp        | 1    | <i>trnW-CCA</i> |
| CCU   | Pro        | 1.23 | <i>trnP-UGG</i> | CGU   | Arg        | 0.64 | <i>trnR-ACG</i> |
| CCC   | Pro        | 0.85 |                 | CGC   | Arg        | 0.35 | <i>trnR-UCU</i> |
| CCA   | Pro        | 1.18 |                 | CGA   | Arg        | 0.98 |                 |
| CCG   | Pro        | 0.74 |                 | CGG   | Arg        | 0.74 |                 |
| ACU   | Thr        | 1.12 |                 | AGA   | Arg        | 2.05 |                 |
| ACC   | Thr        | 0.91 |                 | AGG   | Arg        | 1.24 |                 |
| ACA   | Thr        | 1.27 | <i>trnT-GGU</i> | AGU   | Ser        | 0.81 | <i>trnS-GCU</i> |
| ACG   | Thr        | 0.7  | <i>trnT-UGU</i> | AGC   | Ser        | 0.65 |                 |
| GCU   | Ala        | 1.41 | <i>trnA-UGC</i> | GGU   | Gly        | 0.97 |                 |
| GCC   | Ala        | 0.74 |                 | GGC   | Gly        | 0.56 |                 |
| GCA   | Ala        | 1.11 |                 | GGA   | Gly        | 1.46 |                 |
| GCG   | Ala        | 0.74 |                 | GGG   | Gly        | 1.01 | <i>trnG-UCC</i> |

**Table S5.** Predicted RNA editing site in the *Cadaba farinosa* chloroplast genome

| Gene        | Nucleotide Position | Amino Acid Position | Codon    | Amino Acid | Score |
|-------------|---------------------|---------------------|----------|------------|-------|
| <i>accD</i> | 800                 | 267                 | TCG=>TTG | S=>L       | 0.8   |
| <i>atpF</i> | 92                  | 31                  | CCA=>CTA | P=>L       | 0.86  |
| <i>ccsA</i> | 880                 | 294                 | CCT=>TCT | P=>S       | 0.86  |
| <i>clpP</i> | 562                 | 188                 | CAT=>TAT | H=>Y       | 1     |
| <i>matK</i> | 706                 | 236                 | CAT=>TAT | H=>Y       | 1     |
| <i>matK</i> | 1250                | 417                 | TCA=>TTA | S=>L       | 0.86  |
| <i>matK</i> | 1309                | 437                 | CAC=>TAC | H=>Y       | 1     |
| <i>ndhA</i> | 8                   | 3                   | ACT=>ATT | T=>I       | 1     |
| <i>ndhA</i> | 125                 | 42                  | ACA=>ATA | T=>I       | 0.8   |
| <i>ndhA</i> | 341                 | 114                 | TCA=>TTA | S=>L       | 1     |
| <i>ndhB</i> | 155                 | 52                  | TCA=>TTA | S=>L       | 1     |
| <i>ndhB</i> | 473                 | 158                 | CCA=>CTA | P=>L       | 1     |
| <i>ndhB</i> | 592                 | 198                 | CAT=>TAT | H=>Y       | 1     |
| <i>ndhB</i> | 617                 | 206                 | TCA=>TTA | S=>L       | 0.8   |
| <i>ndhB</i> | 752                 | 251                 | TCT=>TTT | S=>F       | 1     |
| <i>ndhB</i> | 836                 | 279                 | TCA=>TTA | S=>L       | 1     |
| <i>ndhB</i> | 842                 | 281                 | TCA=>TTA | S=>L       | 1     |
| <i>ndhB</i> | 1261                | 421                 | CAT=>TAT | H=>Y       | 1     |
| <i>ndhB</i> | 1487                | 496                 | CCA=>CTA | P=>L       | 1     |
| <i>ndhD</i> | 20                  | 7                   | ACG=>ATG | T=>M       | 1     |
| <i>ndhD</i> | 65                  | 22                  | TCT=>TTT | S=>F       | 0.8   |
| <i>ndhD</i> | 401                 | 134                 | TCA=>TTA | S=>L       | 1     |
| <i>ndhD</i> | 692                 | 231                 | TCA=>TTA | S=>L       | 1     |
| <i>ndhD</i> | 896                 | 299                 | TCA=>TTA | S=>L       | 1     |
| <i>ndhD</i> | 905                 | 302                 | CCT=>CTT | P=>L       | 1     |
| <i>ndhD</i> | 1316                | 439                 | TCA=>TTA | S=>L       | 0.8   |
| <i>ndhD</i> | 1328                | 443                 | TCA=>TTA | S=>L       | 0.8   |
| <i>ndhD</i> | 1423                | 475                 | CTT=>TTT | L=>F       | 0.8   |
| <i>ndhF</i> | 205                 | 69                  | CAT=>TAT | H=>Y       | 0.8   |
| <i>ndhF</i> | 290                 | 97                  | TCA=>TTA | S=>L       | 1     |
| <i>ndhF</i> | 586                 | 196                 | CTT=>TTT | L=>F       | 0.8   |
| <i>ndhG</i> | 166                 | 56                  | CAT=>TAT | H=>Y       | 0.8   |
| <i>ndhG</i> | 314                 | 105                 | ACA=>ATA | T=>I       | 0.8   |
| <i>psaI</i> | 44                  | 15                  | GCA=>GTA | A=>V       | 1     |
| <i>psbE</i> | 214                 | 72                  | CCT=>TCT | P=>S       | 1     |
| <i>psbF</i> | 77                  | 26                  | TCT=>TTT | S=>F       | 1     |
| <i>rpoA</i> | 893                 | 298                 | TCA=>TTA | S=>L       | 1     |
| <i>rpoB</i> | 338                 | 113                 | TCT=>TTT | S=>F       | 1     |
| <i>rpoB</i> | 551                 | 184                 | TCA=>TTA | S=>L       | 1     |

|              |      |     |          |      |      |
|--------------|------|-----|----------|------|------|
| <i>rpoB</i>  | 566  | 189 | TCG=>TTG | S=>L | 1    |
| <i>rpoB</i>  | 2432 | 811 | TCA=>TTA | S=>L | 0.86 |
| <i>rpoC1</i> | 41   | 14  | TCA=>TTA | S=>L | 1    |
| <i>rpoC1</i> | 1717 | 573 | CAC=>TAC | H=>Y | 1    |
| <i>rpoC1</i> | 1946 | 649 | ACT=>ATT | T=>I | 0.86 |
| <i>rpoC2</i> | 2287 | 763 | CGG=>TGG | R=>W | 1    |
| <i>rpoC2</i> | 2336 | 779 | GCC=>GTC | A=>V | 0.86 |
| <i>rps2</i>  | 248  | 83  | TCA=>TTA | S=>L | 1    |
| <i>rps14</i> | 80   | 27  | TCA=>TTA | S=>L | 1    |
| <i>rps14</i> | 149  | 50  | TCA=>TTA | S=>L | 1    |
| <i>rps16</i> | 176  | 59  | TCA=>TTA | S=>L | 0.83 |

**Table S6.** Predicted RNA editing site in the *Cadaba glandulosa* chloroplast genome

| Gene        | Nucleotide<br>Position | Amino<br>Acid<br>Position | Codon    | Amino<br>Acid | Score |
|-------------|------------------------|---------------------------|----------|---------------|-------|
| <i>accD</i> | 800                    | 267                       | TCG=>TTG | S=>L          | 0.8   |
| <i>atpF</i> | 92                     | 31                        | CCA=>CTA | P=>L          | 0.86  |
| <i>clpP</i> | 562                    | 188                       | CAT=>TAT | H=>Y          | 1     |
| <i>matK</i> | 706                    | 236                       | CAT=>TAT | H=>Y          | 1     |
| <i>matK</i> | 1250                   | 417                       | TCA=>TTA | S=>L          | 0.86  |
| <i>matK</i> | 1309                   | 437                       | CAC=>TAC | H=>Y          | 1     |
| <i>ndhA</i> | 8                      | 3                         | ACT=>ATT | T=>I          | 1     |
| <i>ndhA</i> | 341                    | 114                       | TCA=>TTA | S=>L          | 1     |
| <i>ndhB</i> | 149                    | 50                        | TCA=>TTA | S=>L          | 1     |
| <i>ndhB</i> | 467                    | 156                       | CCA=>CTA | P=>L          | 1     |
| <i>ndhB</i> | 586                    | 196                       | CAT=>TAT | H=>Y          | 1     |
| <i>ndhB</i> | 611                    | 204                       | TCA=>TTA | S=>L          | 0.8   |
| <i>ndhB</i> | 746                    | 249                       | TCT=>TTT | S=>F          | 1     |
| <i>ndhB</i> | 830                    | 277                       | TCA=>TTA | S=>L          | 1     |
| <i>ndhB</i> | 836                    | 279                       | TCA=>TTA | S=>L          | 1     |
| <i>ndhB</i> | 1255                   | 419                       | CAT=>TAT | H=>Y          | 1     |
| <i>ndhB</i> | 1481                   | 494                       | CCA=>CTA | P=>L          | 1     |
| <i>ndhD</i> | 20                     | 7                         | ACG=>ATG | T=>M          | 1     |
| <i>ndhD</i> | 65                     | 22                        | TCT=>TTT | S=>F          | 0.8   |
| <i>ndhD</i> | 401                    | 134                       | TCA=>TTA | S=>L          | 1     |
| <i>ndhD</i> | 692                    | 231                       | TCA=>TTA | S=>L          | 1     |
| <i>ndhD</i> | 896                    | 299                       | TCA=>TTA | S=>L          | 1     |
| <i>ndhD</i> | 905                    | 302                       | CCT=>CTT | P=>L          | 1     |
| <i>ndhD</i> | 1328                   | 443                       | TCA=>TTA | S=>L          | 0.8   |
| <i>ndhD</i> | 1423                   | 475                       | CTT=>TTT | L=>F          | 0.8   |
| <i>ndhF</i> | 205                    | 69                        | CAT=>TAT | H=>Y          | 0.8   |
| <i>ndhF</i> | 290                    | 97                        | TCA=>TTA | S=>L          | 1     |

|              |      |     |          |      |      |
|--------------|------|-----|----------|------|------|
| <i>ndhF</i>  | 586  | 196 | CTT=>TTT | L=>F | 0.8  |
| <i>ndhF</i>  | 2002 | 668 | CAC=>TAC | H=>Y | 1    |
| <i>ndhG</i>  | 166  | 56  | CAT=>TAT | H=>Y | 0.8  |
| <i>ndhG</i>  | 314  | 105 | ACA=>ATA | T=>I | 0.8  |
| <i>psaI</i>  | 44   | 15  | GCA=>GTA | A=>V | 1    |
| <i>psbE</i>  | 214  | 72  | CCT=>TCT | P=>S | 1    |
| <i>psbF</i>  | 77   | 26  | TCT=>TTT | S=>F | 1    |
| <i>rpoA</i>  | 887  | 296 | TCA=>TTA | S=>L | 1    |
| <i>rpoB</i>  | 338  | 113 | TCT=>TTT | S=>F | 1    |
| <i>rpoB</i>  | 551  | 184 | TCA=>TTA | S=>L | 1    |
| <i>rpoB</i>  | 566  | 189 | TCG=>TTG | S=>L | 1    |
| <i>rpoB</i>  | 2432 | 811 | TCA=>TTA | S=>L | 0.86 |
| <i>rpoC1</i> | 41   | 14  | TCA=>TTA | S=>L | 1    |
| <i>rpoC1</i> | 1717 | 573 | CAC=>TAC | H=>Y | 1    |
| <i>rpoC1</i> | 1946 | 649 | ACT=>ATT | T=>I | 0.86 |
| <i>rpoC2</i> | 2293 | 765 | CGG=>TGG | R=>W | 1    |
| <i>rpoC2</i> | 2342 | 781 | GCC=>GTC | A=>V | 0.86 |
| <i>rps2</i>  | 248  | 83  | TCA=>TTA | S=>L | 1    |
| <i>rps14</i> | 80   | 27  | TCA=>TTA | S=>L | 1    |
| <i>rps14</i> | 149  | 50  | TCA=>TTA | S=>L | 1    |
| <i>rps16</i> | 176  | 59  | TCA=>TTA | S=>L | 0.83 |

**Table S7.** Predicted RNA editing site in the *Maerua crassifolia* chloroplast genome

| Gene        | Nucleotide Position | Amino Acid Position | Codon    | Amino Acid | Score |
|-------------|---------------------|---------------------|----------|------------|-------|
| <i>accD</i> | 797                 | 266                 | TCG=>TTG | S=>L       | 0.8   |
| <i>atpF</i> | 98                  | 33                  | CCA=>CTA | P=>L       | 0.86  |
| <i>clpP</i> | 562                 | 188                 | CAT=>TAT | H=>Y       | 1     |
| <i>matK</i> | 706                 | 236                 | CAT=>TAT | H=>Y       | 1     |
| <i>matK</i> | 1250                | 417                 | TCA=>TTA | S=>L       | 0.86  |
| <i>matK</i> | 1309                | 437                 | CAC=>TAC | H=>Y       | 1     |
| <i>ndhA</i> | 8                   | 3                   | ACT=>ATT | T=>I       | 1     |
| <i>ndhA</i> | 341                 | 114                 | TCA=>TTA | S=>L       | 1     |
| <i>ndhB</i> | 149                 | 50                  | TCA=>TTA | S=>L       | 1     |
| <i>ndhB</i> | 467                 | 156                 | CCA=>CTA | P=>L       | 1     |
| <i>ndhB</i> | 586                 | 196                 | CAT=>TAT | H=>Y       | 1     |
| <i>ndhB</i> | 611                 | 204                 | TCA=>TTA | S=>L       | 0.8   |
| <i>ndhB</i> | 746                 | 249                 | TCT=>TTT | S=>F       | 1     |



|              |      |     |          |      |      |
|--------------|------|-----|----------|------|------|
| <i>ndhB</i>  | 830  | 277 | TCA=>TTA | S=>L | 1    |
| <i>ndhB</i>  | 836  | 279 | TCA=>TTA | S=>L | 1    |
| <i>ndhB</i>  | 1255 | 419 | CAT=>TAT | H=>Y | 1    |
| <i>ndhB</i>  | 1481 | 494 | CCA=>CTA | P=>L | 1    |
| <i>ndhD</i>  | 20   | 7   | ACG=>ATG | T=>M | 1    |
| <i>ndhD</i>  | 65   | 22  | TCT=>TTT | S=>F | 0.8  |
| <i>ndhD</i>  | 401  | 134 | TCA=>TTA | S=>L | 1    |
| <i>ndhD</i>  | 692  | 231 | TCA=>TTA | S=>L | 1    |
| <i>ndhD</i>  | 896  | 299 | TCA=>TTA | S=>L | 1    |
| <i>ndhD</i>  | 905  | 302 | CCT=>CTT | P=>L | 1    |
| <i>ndhD</i>  | 1328 | 443 | TCA=>TTA | S=>L | 0.8  |
| <i>ndhD</i>  | 1423 | 475 | CTT=>TTT | L=>F | 0.8  |
| <i>ndhF</i>  | 205  | 69  | CAT=>TAT | H=>Y | 0.8  |
| <i>ndhF</i>  | 290  | 97  | TCA=>TTA | S=>L | 1    |
| <i>ndhF</i>  | 586  | 196 | CTT=>TTT | L=>F | 0.8  |
| <i>ndhF</i>  | 2002 | 668 | CAC=>TAC | H=>Y | 1    |
| <i>ndhG</i>  | 166  | 56  | CAT=>TAT | H=>Y | 0.8  |
| <i>ndhG</i>  | 314  | 105 | ACA=>ATA | T=>I | 0.8  |
| <i>psaI</i>  | 44   | 15  | GCA=>GTA | A=>V | 1    |
| <i>psbE</i>  | 214  | 72  | CCT=>TCT | P=>S | 1    |
| <i>psbF</i>  | 77   | 26  | TCT=>TTT | S=>F | 1    |
| <i>rpoA</i>  | 887  | 296 | TCA=>TTA | S=>L | 1    |
| <i>rpoB</i>  | 338  | 113 | TCT=>TTT | S=>F | 1    |
| <i>rpoB</i>  | 551  | 184 | TCA=>TTA | S=>L | 1    |
| <i>rpoB</i>  | 566  | 189 | TCG=>TTG | S=>L | 1    |
| <i>rpoB</i>  | 2432 | 811 | TCA=>TTA | S=>L | 0.86 |
| <i>rpoC1</i> | 41   | 14  | TCA=>TTA | S=>L | 1    |
| <i>rpoC1</i> | 1717 | 573 | CAC=>TAC | H=>Y | 1    |
| <i>rpoC1</i> | 1946 | 649 | ACT=>ATT | T=>I | 0.86 |
| <i>rpoC2</i> | 2293 | 765 | CGG=>TGG | R=>W | 1    |
| <i>rpoC2</i> | 2342 | 781 | GCC=>GTC | A=>V | 0.86 |
| <i>rps2</i>  | 248  | 83  | TCA=>TTA | S=>L | 1    |
| <i>rps14</i> | 80   | 27  | TCA=>TTA | S=>L | 1    |
| <i>rps14</i> | 149  | 50  | TCA=>TTA | S=>L | 1    |
| <i>rps16</i> | 176  | 59  | TCA=>TTA | S=>L | 0.83 |

**Table S8.** Predicted RNA editing site in the *Maerua oblongifolia* chloroplast genome

| Gene        | Nucleotide Position | Amino Acid Position | Codon    | Amino Acid | Score |
|-------------|---------------------|---------------------|----------|------------|-------|
| <i>accD</i> | 797                 | 266                 | TCG=>TTG | S=>L       | 0.8   |
| <i>atpF</i> | 92                  | 31                  | CCA=>CTA | P=>L       | 0.86  |
| <i>clpP</i> | 562                 | 188                 | CAT=>TAT | H=>Y       | 1     |

|              |      |     |          |      |      |
|--------------|------|-----|----------|------|------|
| <i>matK</i>  | 706  | 236 | CAT=>TAT | H=>Y | 1    |
| <i>matK</i>  | 1250 | 417 | TCA=>TTA | S=>L | 0.86 |
| <i>matK</i>  | 1309 | 437 | CAC=>TAC | H=>Y | 1    |
| <i>ndhA</i>  | 8    | 3   | ACT=>ATT | T=>I | 1    |
| <i>ndhA</i>  | 125  | 42  | ACA=>ATA | T=>I | 0.8  |
| <i>ndhA</i>  | 341  | 114 | TCA=>TTA | S=>L | 1    |
| <i>ndhB</i>  | 155  | 52  | TCA=>TTA | S=>L | 1    |
| <i>ndhB</i>  | 473  | 158 | CCA=>CTA | P=>L | 1    |
| <i>ndhB</i>  | 592  | 198 | CAT=>TAT | H=>Y | 1    |
| <i>ndhB</i>  | 617  | 206 | TCA=>TTA | S=>L | 0.8  |
| <i>ndhB</i>  | 752  | 251 | TCT=>TTT | S=>F | 1    |
| <i>ndhB</i>  | 836  | 279 | TCA=>TTA | S=>L | 1    |
| <i>ndhB</i>  | 842  | 281 | TCA=>TTA | S=>L | 1    |
| <i>ndhB</i>  | 1261 | 421 | CAT=>TAT | H=>Y | 1    |
| <i>ndhB</i>  | 1487 | 496 | CCA=>CTA | P=>L | 1    |
| <i>ndhD</i>  | 20   | 7   | ACG=>ATG | T=>M | 1    |
| <i>ndhD</i>  | 65   | 22  | TCT=>TTT | S=>F | 0.8  |
| <i>ndhD</i>  | 401  | 134 | TCA=>TTA | S=>L | 1    |
| <i>ndhD</i>  | 692  | 231 | TCA=>TTA | S=>L | 1    |
| <i>ndhD</i>  | 896  | 299 | TCA=>TTA | S=>L | 1    |
| <i>ndhD</i>  | 905  | 302 | CCT=>CTT | P=>L | 1    |
| <i>ndhD</i>  | 1316 | 439 | TCA=>TTA | S=>L | 0.8  |
| <i>ndhD</i>  | 1328 | 443 | TCA=>TTA | S=>L | 0.8  |
| <i>ndhD</i>  | 1423 | 475 | CTT=>TTT | L=>F | 0.8  |
| <i>ndhF</i>  | 205  | 69  | CAT=>TAT | H=>Y | 0.8  |
| <i>ndhF</i>  | 290  | 97  | TCA=>TTA | S=>L | 1    |
| <i>ndhF</i>  | 586  | 196 | CTT=>TTT | L=>F | 0.8  |
| <i>ndhG</i>  | 166  | 56  | CAT=>TAT | H=>Y | 0.8  |
| <i>ndhG</i>  | 314  | 105 | ACA=>ATA | T=>I | 0.8  |
| <i>psaI</i>  | 44   | 15  | GCA=>GTA | A=>V | 1    |
| <i>psbF</i>  | 77   | 26  | TCT=>TTT | S=>F | 1    |
| <i>rpI20</i> | 26   | 9   | ACA=>ATA | T=>I | 0.86 |
| <i>rpoA</i>  | 887  | 296 | TCA=>TTA | S=>L | 1    |
| <i>rpoB</i>  | 338  | 113 | TCT=>TTT | S=>F | 1    |
| <i>rpoB</i>  | 551  | 184 | TCA=>TTA | S=>L | 1    |
| <i>rpoB</i>  | 566  | 189 | TCG=>TTG | S=>L | 1    |
| <i>rpoB</i>  | 2432 | 811 | TCA=>TTA | S=>L | 0.86 |
| <i>rpoC1</i> | 41   | 14  | TCA=>TTA | S=>L | 1    |
| <i>rpoC1</i> | 1717 | 573 | CAC=>TAC | H=>Y | 1    |
| <i>rpoC1</i> | 1946 | 649 | ACT=>ATT | T=>I | 0.86 |
| <i>rpoC2</i> | 2287 | 763 | CGG=>TGG | R=>W | 1    |
| <i>rpoC2</i> | 2336 | 779 | GCC=>GTC | A=>V | 0.86 |
| <i>rps2</i>  | 248  | 83  | TCA=>TTA | S=>L | 1    |

|              |     |    |          |      |      |
|--------------|-----|----|----------|------|------|
| <i>rps14</i> | 149 | 50 | TCA=>TTA | S=>L | 1    |
| <i>rps16</i> | 176 | 59 | TCA=>TTA | S=>L | 0.83 |

**Table S9.** Repeat sequences present in the *Cadaba farinose* chloroplast genome

| SN | Repeat Size | Repeat Position 1 | Repeat Type | Repeat Location | Repeat Position 2 | Repeat Location 2                  | E-Value  |
|----|-------------|-------------------|-------------|-----------------|-------------------|------------------------------------|----------|
| 1  | 64          | 39696             | F           | <i>psaB</i>     | 41920             | <i>psaA</i>                        | 2.02E-29 |
| 2  | 44          | 75442             | P           | IGS             | 75442             | IGS                                | 2.23E-17 |
| 3  | 34          | 29585             | P           | IGS             | 29585             | IGS                                | 2.33E-11 |
| 4  | 30          | 8202              | P           | IGS             | 45811             | <i>trnS-GGA</i>                    | 5.97E-09 |
| 5  | 28          | 127142            | P           | IGS             | 127142            | IGS                                | 9.56E-08 |
| 6  | 26          | 9740              | P           | IGS             | 9772              | IGS                                | 1.53E-06 |
| 7  | 26          | 61740             | P           | <i>cemA</i>     | 61740             | <i>cemA</i>                        | 1.53E+00 |
| 8  | 24          | 31569             | P           | IGS             | 31569             | IGS                                | 2.45E-05 |
| 9  | 24          | 115382            | P           | IGS             | 115382            | IGS                                | 2.45E-05 |
| 10 | 23          | 114633            | R           | IGS             | 114633            | IGS                                | 9.79E-05 |
| 11 | 22          | 5279              | R           | IGS             | 5279              | IGS                                | 3.91E-04 |
| 12 | 22          | 90517             | F           | <i>ycf2</i>     | 90538             | <i>ycf2</i>                        | 3.91E-04 |
| 13 | 22          | 90517             | P           | <i>ycf2</i>     | 151486            | <i>ycf2</i>                        | 3.91E-04 |
| 14 | 22          | 90538             | P           | <i>ycf2</i>     | 151507            | <i>ycf2</i>                        | 3.91E-04 |
| 15 | 22          | 111580            | P           | <i>ycf1</i>     | 111580            | <i>ycf1</i>                        | 3.91E-04 |
| 16 | 22          | 111580            | F           | <i>ycf1</i>     | 130444            | IGS                                | 3.91E-04 |
| 17 | 22          | 130444            | P           | IGS             | 130444            | IGS                                | 3.91E-04 |
| 18 | 22          | 151486            | F           | <i>ycf2</i>     | 151507            | <i>ycf2</i>                        | 3.91E-04 |
| 19 | 21          | 8208              | F           | <i>trnS-GCU</i> | 36412             | <i>trnS-UGA</i>                    | 1.57E-03 |
| 20 | 21          | 30738             | P           | IGS             | 72595             | <i>clpP</i> Intron                 | 1.57E-03 |
| 21 | 21          | 36412             | P           | <i>trnS-UGA</i> | 45814             | <i>trnS-GGA</i>                    | 1.57E-03 |
| 22 | 21          | 37671             | F           | <i>trnM-CAU</i> | 67641             | <i>trnP-UGG</i><br><i>trnP-GGG</i> | 1.57E-03 |
| 23 | 21          | 90484             | F           | <i>ycf2</i>     | 90529             | <i>ycf2</i>                        | 1.57E-03 |
| 24 | 21          | 90484             | P           | <i>ycf2</i>     | 151496            | <i>ycf2</i>                        | 1.57E-03 |
| 25 | 21          | 90529             | P           | <i>ycf2</i>     | 151541            | <i>ycf2</i>                        | 1.57E-03 |
| 26 | 21          | 114445            | P           | IGS             | 114913            | IGS                                | 1.57E-03 |
| 27 | 21          | 114538            | R           | IGS             | 114538            | IGS                                | 1.57E-03 |
| 28 | 21          | 151496            | F           | <i>ycf2</i>     | 151541            | <i>ycf2</i>                        | 1.57E-03 |
| 29 | 20          | 370               | P           | IGS             | 370               | IGS                                | 6.26E-03 |
| 30 | 20          | 3909              | P           | IGS             | 3909              | IGS                                | 6.26E-03 |
| 31 | 20          | 4886              | P           | IGS             | 4886              | IGS                                | 6.26E-03 |
| 32 | 20          | 13855             | F           | IGS             | 89473             | <i>ycf2</i>                        | 6.26E-03 |
| 33 | 20          | 13855             | P           | IGS             | 152553            | <i>ycf2</i>                        | 6.26E-03 |
| 34 | 20          | 28661             | F           | IGS             | 55576             | IGS                                | 6.26E-03 |

|    |    |       |   |                           |        |                 |          |
|----|----|-------|---|---------------------------|--------|-----------------|----------|
| 35 | 20 | 36480 | P | <i>trnS-UGA</i>           | 45753  | IGS             | 6.26E-03 |
| 36 | 20 | 44401 | R | IGS                       | 65664  | IGS             | 6.26E-03 |
| 37 | 20 | 48417 | P | <i>trnL-UAA</i><br>Intron | 66939  | IGS             | 6.26E-03 |
| 38 | 20 | 51127 | R | <i>ndhC</i>               | 51127  | <i>ndhC</i>     | 6.26E-03 |
| 39 | 19 | 325   | P | IGS                       | 5279   | IGS             | 2.51E-02 |
| 40 | 19 | 325   | C | IGS                       | 5282   | IGS             | 2.51E-02 |
| 41 | 19 | 4650  | R | IGS                       | 4650   | IGS             | 2.51E-02 |
| 42 | 19 | 4760  | C | IGS                       | 114444 | IGS             | 2.51E-02 |
| 43 | 19 | 4761  | C | IGS                       | 61352  | IGS             | 2.51E-02 |
| 44 | 19 | 4763  | R | IGS                       | 4763   | IGS             | 2.51E-02 |
| 45 | 19 | 8719  | R | IGS                       | 8719   | IGS             | 2.51E-02 |
| 46 | 19 | 9654  | F | IGS                       | 37505  | <i>trnG-UCC</i> | 2.51E-02 |
| 47 | 19 | 15183 | R | <i>atpI</i>               | 15183  | <i>atpI</i>     | 2.51E-02 |
| 48 | 19 | 23265 | P | <i>rpoC1</i> Intron       | 114912 | IGS             | 2.51E-02 |
| 49 | 19 | 23267 | F | <i>rpoC1</i> Intron       | 53212  | IGS             | 2.51E-02 |

**Table S10.** Repeat sequences present in the *Cadaba glandulosa* chloroplast genome

| SN | Repeat<br>Size | Repeat<br>Position 1 | Repeat<br>Type | Repeat<br>Location | Repeat<br>Position 2 | Repeat<br>Location 2 | E-Value  |
|----|----------------|----------------------|----------------|--------------------|----------------------|----------------------|----------|
| 1  | 64             | 39682                | F              | <i>psaB</i>        | 41906                | <i>psaA</i>          | 2.03E-29 |
| 2  | 44             | 75578                | P              | IGS                | 75578                | IGS                  | 2.23E-17 |
| 3  | 39             | 0                    | P              | IGS                | 85642                | <i>rps19</i>         | 2.28E-14 |
| 4  | 36             | 29576                | P              | IGS                | 29576                | IGS                  | 1.46E-12 |
| 5  | 30             | 8188                 | P              | IGS                | 45811                | <i>trnS-GGA</i>      | 5.98E-09 |
| 6  | 28             | 67079                | P              | IGS                | 67079                | IGS                  | 9.57E-08 |
| 7  | 28             | 127227               | P              | IGS                | 127227               | IGS                  | 9.57E-08 |
| 8  | 26             | 9774                 | P              | IGS                | 9806                 | IGS                  | 1.53E-06 |
| 9  | 26             | 10148                | P              | IGS                | 10148                | IGS                  | 1.53E-06 |
| 10 | 26             | 61883                | P              | <i>cemA</i>        | 61883                | <i>cemA</i>          | 1.53E-06 |
| 11 | 24             | 27878                | P              | IGS                | 27878                | IGS                  | 2.45E-05 |
| 12 | 24             | 31593                | P              | IGS                | 31593                | IGS                  | 2.45E-05 |
| 13 | 24             | 115478               | P              | IGS                | 115478               | IGS                  | 2.45E-05 |
| 14 | 22             | 51600                | R              | IGS                | 51600                | IGS                  | 3.92E-04 |
| 15 | 22             | 90595                | F              | <i>ycf2</i>        | 90616                | <i>ycf2</i>          | 3.92E-04 |
| 16 | 22             | 90595                | P              | <i>ycf2</i>        | 151603               | <i>ycf2</i>          | 3.92E-04 |
| 17 | 22             | 90616                | P              | <i>ycf2</i>        | 151624               | <i>ycf2</i>          | 3.92E-04 |
| 18 | 22             | 111681               | P              | <i>ycf1</i>        | 111681               | <i>ycf1</i>          | 3.92E-04 |
| 19 | 22             | 111681               | F              | <i>ycf1</i>        | 130538               | IGS                  | 3.92E-04 |
| 20 | 22             | 130538               | P              | IGS                | 130538               | IGS                  | 3.92E-04 |
| 21 | 22             | 151603               | F              | <i>ycf2</i>        | 151624               | <i>ycf2</i>          | 3.92E-04 |

|    |    |        |   |                           |        |                           |          |
|----|----|--------|---|---------------------------|--------|---------------------------|----------|
| 22 | 21 | 8194   | F | <i>trnS-GCU</i>           | 36410  | <i>trnS-UGA</i>           | 1.57E-03 |
| 23 | 21 | 8406   | R | IGS                       | 8406   | IGS                       | 1.57E-03 |
| 24 | 21 | 10188  | P | IGS                       | 10214  | IGS                       | 1.57E-03 |
| 25 | 21 | 36410  | P | <i>trnS-UGA</i>           | 45814  | <i>trnS-GGA</i>           | 1.57E-03 |
| 26 | 21 | 37674  | F | <i>trnfM-CAU</i>          | 67774  | <i>trnP-UGG trnP-GGG</i>  | 1.57E-03 |
| 27 | 21 | 48431  | P | <i>trnL-UAA</i><br>Intron | 67082  | IGS                       | 1.57E-03 |
| 28 | 21 | 48431  | F | <i>trnL-UAA</i><br>Intron | 67083  | IGS                       | 1.57E-03 |
| 29 | 21 | 49478  | C | IGS                       | 109765 | IGS                       | 1.57E-03 |
| 30 | 21 | 49478  | R | IGS                       | 132455 | IGS                       | 1.57E-03 |
| 31 | 21 | 61505  | F | IGS                       | 114548 | IGS                       | 1.57E-03 |
| 32 | 21 | 71728  | R | <i>clpP</i> Intron        | 71728  | <i>clpP</i> Intron        | 1.57E-03 |
| 33 | 21 | 90562  | F | <i>ycf2</i>               | 90607  | <i>ycf2</i>               | 1.57E-03 |
| 34 | 21 | 90562  | P | <i>ycf2</i>               | 151613 | <i>ycf2</i>               | 1.57E-03 |
| 35 | 21 | 90607  | P | <i>ycf2</i>               | 151658 | <i>ycf2</i>               | 1.57E-03 |
| 36 | 21 | 151613 | F | <i>ycf2</i>               | 151658 | <i>ycf2</i>               | 1.57E-03 |
| 37 | 20 | 281    | R | IGS                       | 109767 | IGS                       | 6.27E-03 |
| 38 | 20 | 281    | C | IGS                       | 132454 | IGS                       | 6.27E-03 |
| 39 | 20 | 282    | R | IGS                       | 282    | IGS                       | 6.27E-03 |
| 40 | 20 | 289    | C | IGS                       | 114554 | IGS                       | 6.27E-03 |
| 41 | 20 | 4854   | P | IGS                       | 4854   | IGS                       | 6.27E-03 |
| 42 | 20 | 13886  | F | IGS                       | 89551  | <i>ycf2</i>               | 6.27E-03 |
| 43 | 20 | 13886  | P | IGS                       | 152670 | <i>ycf2</i>               | 6.27E-03 |
| 44 | 20 | 36478  | P | <i>trnS-UGA</i>           | 45753  | IGS                       | 6.27E-03 |
| 45 | 20 | 44406  | R | IGS                       | 65814  | IGS                       | 6.27E-03 |
| 46 | 20 | 48431  | P | <i>trnL-UAA</i><br>Intron | 48431  | <i>trnL-UAA</i><br>Intron | 6.27E-03 |
| 47 | 20 | 51151  | R | <i>ndhC</i>               | 51151  | <i>ndhC</i>               | 6.27E-03 |
| 48 | 20 | 51622  | F | IGS                       | 51635  | IGS                       | 6.27E-03 |
| 49 | 19 | 282    | P | IGS                       | 49480  | IGS                       | 2.51E-02 |

**Table S11.** Repeat sequences present in the *Maerua crassifolia* chloroplast genome

| SN | Repeat Size | Repeat Position 1 | Repeat Type | Repeat Location | Repeat Position 2 | Repeat Location 2 | E-Value  |
|----|-------------|-------------------|-------------|-----------------|-------------------|-------------------|----------|
| 1  | 52          | 0                 | P           | IGS             | 84572             | <i>rps19</i>      | 3.36E-22 |
| 2  | 52          | 29460             | P           | IGS             | 29460             | IGS               | 3.36E-22 |
| 3  | 52          | 39525             | F           | <i>psaB</i>     | 41749             | <i>psaA</i>       | 3.36E-22 |
| 4  | 43          | 33135             | F           | IGS             | 33156             | IGS               | 8.81E-17 |
| 5  | 42          | 74663             | P           | IGS             | 74663             | IGS               | 3.52E-16 |
| 6  | 30          | 8240              | P           | IGS             | 45697             | IGS               | 5.91E-09 |

|    |    |        |   |                  |        |                          |          |
|----|----|--------|---|------------------|--------|--------------------------|----------|
| 7  | 25 | 116737 | P | IGS              | 116813 | IGS                      | 6.05E-06 |
| 8  | 24 | 31484  | P | IGS              | 31484  | IGS                      | 2.42E-05 |
| 9  | 24 | 124714 | P | IGS              | 124714 | IGS                      | 2.42E-05 |
| 10 | 22 | 418    | P | IGS              | 418    | IGS                      | 3.87E-04 |
| 11 | 22 | 33135  | F | IGS              | 33177  | IGS                      | 3.87E-04 |
| 12 | 22 | 89527  | F | <i>ycf2</i>      | 89548  | <i>ycf2</i>              | 3.87E-04 |
| 13 | 22 | 89527  | P | <i>ycf2</i>      | 150739 | <i>ycf2</i>              | 3.87E-04 |
| 14 | 22 | 89548  | P | <i>ycf2</i>      | 150760 | <i>ycf2</i>              | 3.87E-04 |
| 15 | 22 | 110500 | P | <i>ycf1</i>      | 110500 | <i>ycf1</i>              | 3.87E-04 |
| 16 | 22 | 110500 | F | <i>ycf1</i>      | 129787 | IGS                      | 3.87E-04 |
| 17 | 22 | 129787 | P | IGS              | 129787 | IGS                      | 3.87E-04 |
| 18 | 22 | 150739 | F | <i>ycf2</i>      | 150760 | <i>ycf2</i>              | 3.87E-04 |
| 19 | 21 | 8246   | F | <i>trnS-GCU</i>  | 36291  | <i>trnS-UGA</i>          | 1.55E-03 |
| 20 | 21 | 10044  | R | IGS              | 10044  | IGS                      | 1.55E-03 |
| 21 | 21 | 36291  | p | <i>trnS-UGA</i>  | 45700  | <i>trnS-UGA</i>          | 1.55E-03 |
| 22 | 21 | 37504  | F | <i>trnfM-CAU</i> | 66941  | <i>trnP-UGG trnP-GGG</i> | 1.55E-03 |
| 23 | 21 | 113435 | R | IGS              | 113435 | IGS                      | 1.55E-03 |
| 24 | 21 | 114388 | P | IGS              | 114450 | IGS                      | 1.55E-03 |
| 25 | 20 | 13709  | F | IGS              | 88483  | <i>ycf2</i>              | 6.20E-03 |
| 26 | 20 | 13709  | P | IGS              | 151806 | <i>ycf2</i>              | 6.20E-03 |
| 27 | 20 | 36359  | P | <i>trnS-UGA</i>  | 45639  | IGS                      | 6.20E-03 |
| 28 | 20 | 44299  | R | IGS              | 65236  | IGS                      | 6.20E-03 |
| 29 | 20 | 48298  | F | IGS              | 66266  | IGS                      | 6.20E-03 |
| 30 | 20 | 63710  | P | IGS              | 82317  | IGS                      | 6.20E-03 |
| 31 | 19 | 8763   | R | IGS              | 113809 | IGS                      | 2.48E-02 |
| 32 | 19 | 9729   | F | IGS              | 37333  | <i>trnG-UCC</i>          | 2.48E-02 |
| 33 | 19 | 10044  | F | IGS              | 63644  | IGS                      | 2.48E-02 |
| 34 | 19 | 10046  | R | IGS              | 63644  | IGS                      | 2.48E-02 |
| 35 | 19 | 15102  | R | <i>atpI</i>      | 15102  | <i>atpI</i>              | 2.48E-02 |
| 36 | 19 | 37154  | R | IGS              | 37154  | IGS                      | 2.48E-02 |
| 37 | 19 | 42892  | R | IGS              | 42892  | IGS                      | 2.48E-02 |
| 38 | 19 | 47004  | R | IGS              | 47004  | IGS                      | 2.48E-02 |
| 39 | 19 | 48900  | F | <i>trnF-GAA</i>  | 104247 | <i>atpA</i>              | 2.48E-02 |
| 40 | 19 | 48900  | P | <i>trnF-GAA</i>  | 136043 | <i>trnA-UGC Exon</i>     | 2.48E-02 |
| 41 | 19 | 62026  | R | <i>trnF-GAA</i>  | 62026  | <i>trnF-GAA</i>          | 2.48E-02 |
| 42 | 19 | 64086  | F | <i>trnF-GAA</i>  | 121855 | <i>ndhA Intron</i>       | 2.48E-02 |
| 43 | 19 | 78489  | R | <i>rpoA</i>      | 78489  | <i>rpoA</i>              | 2.48E-02 |
| 44 | 19 | 94433  | R | IGS              | 94433  | IGS                      | 2.48E-02 |
| 45 | 19 | 94433  | C | IGS              | 145857 | IGS                      | 2.48E-02 |
| 46 | 19 | 109015 | R | IGS              | 128188 | IGS                      | 2.48E-02 |

|    |    |        |   |     |        |     |          |
|----|----|--------|---|-----|--------|-----|----------|
| 47 | 19 | 113340 | R | IGS | 113340 | IGS | 2.48E-02 |
| 48 | 19 | 114412 | R | IGS | 114412 | IGS | 2.48E-02 |
| 49 | 19 | 115515 | R | IGS | 115515 | IGS | 2.48E-02 |

Table S12. Repeat sequences present in the *Maerua oblongifolia* chloroplast genome

| SN | Repeat Size | Repeat Position 1 | Repeat Type | Repeat Location    | Repeat Position 2 | Repeat Location 2                  | E-Value  |
|----|-------------|-------------------|-------------|--------------------|-------------------|------------------------------------|----------|
| 1  | 52          | 29639             | P           | IGS                | 29639             | IGS                                | 3.35E-22 |
| 2  | 52          | 39179             | F           | <i>psaB</i>        | 41403             | <i>psaA</i>                        | 3.35E-22 |
| 3  | 42          | 74217             | P           | IGS                | 74217             | IGS                                | 3.51E-16 |
| 4  | 30          | 8263              | P           | IGS                | 45323             | IGS                                | 5.89E-09 |
| 5  | 28          | 126072            | P           | IGS                | 126072            | IGS                                | 9.43E-08 |
| 6  | 26          | 388               | P           | IGS                | 423               | IGS                                | 1.51E-06 |
| 7  | 26          | 9800              | P           | IGS                | 9832              | IGS                                | 1.51E-06 |
| 8  | 26          | 10040             | P           | IGS                | 10040             | IGS                                | 1.51E-06 |
| 9  | 26          | 31157             | P           | IGS                | 31157             | IGS                                | 1.51E-06 |
| 10 | 23          | 0                 | P           | IGS                | 84130             | <i>rps19</i>                       | 9.66E-05 |
| 11 | 22          | 70135             | P           | <i>clpP</i> Intron | 100101            | <i>rrn16</i>                       | 3.86E-04 |
| 12 | 22          | 70135             | F           | <i>clpP</i> Intron | 139466            | IGS                                | 3.86E-04 |
| 13 | 22          | 89084             | F           | <i>ycf2</i>        | 89105             | <i>ycf2</i>                        | 3.86E-04 |
| 14 | 22          | 89084             | P           | <i>ycf2</i>        | 150462            | <i>ycf2</i>                        | 3.86E-04 |
| 15 | 22          | 89105             | P           | <i>ycf2</i>        | 150483            | <i>ycf2</i>                        | 3.86E-04 |
| 16 | 22          | 110133            | P           | <i>ycf1</i>        | 110133            | <i>ycf1</i>                        | 3.86E-04 |
| 17 | 22          | 110133            | F           | <i>ycf1</i>        | 129434            | IGS                                | 3.86E-04 |
| 18 | 22          | 129434            | P           | IGS                | 129434            | IGS                                | 3.86E-04 |
| 19 | 22          | 150462            | F           | <i>ycf2</i>        | 150483            | <i>ycf2</i>                        | 3.86E-04 |
| 20 | 21          | 8269              | F           | <i>trnS-GCU</i>    | 35920             | <i>trnS-UGA</i>                    | 1.55E-03 |
| 21 | 21          | 10033             | R           | IGS                | 10033             | IGS                                | 1.55E-03 |
| 22 | 21          | 35920             | P           | <i>trnS-UGA</i>    | 45326             | IGS                                | 1.55E-03 |
| 23 | 21          | 37155             | F           | <i>trnfm-CAU</i>   | 66481             | <i>trnP-UGG</i><br><i>trnP-GGG</i> | 1.55E-03 |
| 24 | 21          | 50040             | R           | <i>ndhK-psbG</i>   | 50040             | <i>ndhK-psbG</i>                   | 1.55E-03 |
| 25 | 21          | 113074            | R           | IGS                | 113074            | IGS                                | 1.55E-03 |
| 26 | 21          | 114033            | P           | IGS                | 114095            | IGS                                | 1.55E-03 |
| 27 | 21          | 114428            | R           | IGS                | 114428            | IGS                                | 1.55E-03 |
| 28 | 21          | 116403            | P           | IGS                | 116428            | IGS                                | 1.55E-03 |
| 29 | 20          | 5170              | P           | IGS                | 5194              | IGS                                | 6.18E-03 |
| 30 | 20          | 8398              | P           | IGS                | 54240             | <i>atpB</i>                        | 6.18E-03 |
| 31 | 20          | 8707              | P           | IGS                | 116404            | IGS                                | 6.18E-03 |
| 32 | 20          | 8707              | F           | IGS                | 116428            | IGS                                | 6.18E-03 |
| 33 | 20          | 35988             | P           | <i>trnS-UGA</i>    | 45265             | IGS                                | 6.18E-03 |

|    |    |       |   |                  |        |                         |          |
|----|----|-------|---|------------------|--------|-------------------------|----------|
| 34 | 20 | 47912 | F | IGS              | 65793  | IGS                     | 6.18E-03 |
| 35 | 20 | 50234 | R | <i>ndhC</i>      | 50234  | <i>ndhC</i>             | 6.18E-03 |
| 36 | 20 | 75118 | R | IGS              | 75118  | IGS                     | 6.18E-03 |
| 37 | 19 | 1742  | P | IGS              | 59660  | IGS                     | 2.47E-02 |
| 38 | 19 | 6921  | P | IGS              | 6942   | IGS                     | 2.47E-02 |
| 39 | 19 | 9714  | F | IGS              | 36982  | <i>trnG-UCC</i>         | 2.47E-02 |
| 40 | 19 | 13903 | F | <i>atpH</i>      | 36234  | IGS                     | 2.47E-02 |
| 41 | 19 | 15301 | R | <i>atpI</i>      | 15301  | <i>atpI</i>             | 2.47E-02 |
| 42 | 19 | 32992 | C | IGS              | 82412  | IGS                     | 2.47E-02 |
| 43 | 19 | 46463 | F | IGS              | 50040  | <i>ndhK-psbG</i>        | 2.47E-02 |
| 44 | 19 | 46463 | R | IGS              | 50042  | <i>ndhK-psbG</i>        | 2.47E-02 |
| 45 | 19 | 48513 | F | <i>trnF-GAA</i>  | 103817 | <i>trnA-UGC</i><br>Exon | 2.47E-02 |
| 46 | 19 | 48513 | P | <i>trnF-GAA</i>  | 135753 | <i>trnA-UGC</i><br>Exon | 2.47E-02 |
| 47 | 19 | 50048 | R | <i>ndhK-psbG</i> | 50048  | <i>ndhK-psbG</i>        | 2.47E-02 |
| 48 | 19 | 63240 | R | IGS              | 78046  | <i>rpoA</i>             | 2.47E-02 |
| 49 | 19 | 78044 | R | <i>rpoA</i>      | 78044  | <i>rpoA</i>             | 2.47E-02 |

---
